# Supplementary material for: Imprinting disorder in donor cells is detrimental to the development of cloned embryos in pigs
Source: PubMed Central journal article supplement (PMC5641136; doi:10.18632/oncotarget.20390), 2017-08-22
Supplement: oncotarget-08-72363-s001.pdf [file oncotarget-08-72363-s001.pdf]

## Imprinting disorder in donor cells is detrimental to the development of cloned embryos in pigs

### SUPPLEMENTARY MATERIALS

**Supplementary Table 1: Detail of primers for quantitative real-time PCR**

| Gene      | Primer sequence (5'-3')                                     | Length (bp) | Accession number |
|-----------|-------------------------------------------------------------|-------------|------------------|
| H19       | F: TCAAACGACAAGAGATGGTGCTA<br>R: CAAGTAGTGTAGTGGCTCCAGAATG  | 118         | AY_044827        |
| Igf2      | F: CCGTGGCATCGTGGAAGAGTG<br>R: TCCAGGTGTCATAGCGGAAGAAC      | 170         | NM_213883        |
| Dnmt1     | F: GCGTCTTGCAGGCTGGTCAGTA<br>R: CTTCTTATCATCGACCACGACGCT    | 152         | NM_001032355     |
| Dnmt3a    | F: ATGTGGTTCGGAGACGGCAAGT<br>R: GCTCTCGTCGTTGTCATGGCA       | 195         | NM_001097437     |
| Zfp57     | F: GGAGACCAAGTCCGACTCACAT<br>R: CAGCGGTTGACTGCTCTATG        | 141         | NM_001123132     |
| $\beta$ m | F: CTTTCTACCTTCTGGTCCACACTG<br>R: GTGGTCTCGATCCCACTTAACTATC | 116         | NM_213978        |
| 18s       | F: AATCTCGGGTGGCTGAACGC<br>R: CCGTTCTTAGTTGGTGGAGCGAT       | 143         | NR_002170        |

**Supplementary Table 2: Detail of primers for H19/Igf2 imprinting bisulfite sequencing**

| Gene     | Primer sequence (5'-3')                                         | Primer annealing temperature (°C) | Length (bp) | Accession number |
|----------|-----------------------------------------------------------------|-----------------------------------|-------------|------------------|
| H19/Igf2 | Outer<br>F: GGTTTTAGGGGGATATTTTTT<br>R: TTAACAAAAACACTTCCATATAC | 55                                | 384         | AY_044827        |
|          | Inner<br>F: GATTTTTAGGTTTGTATTATTT<br>R: CAAATATTCAATAAAAAAACC  | 50                                | 208         |                  |

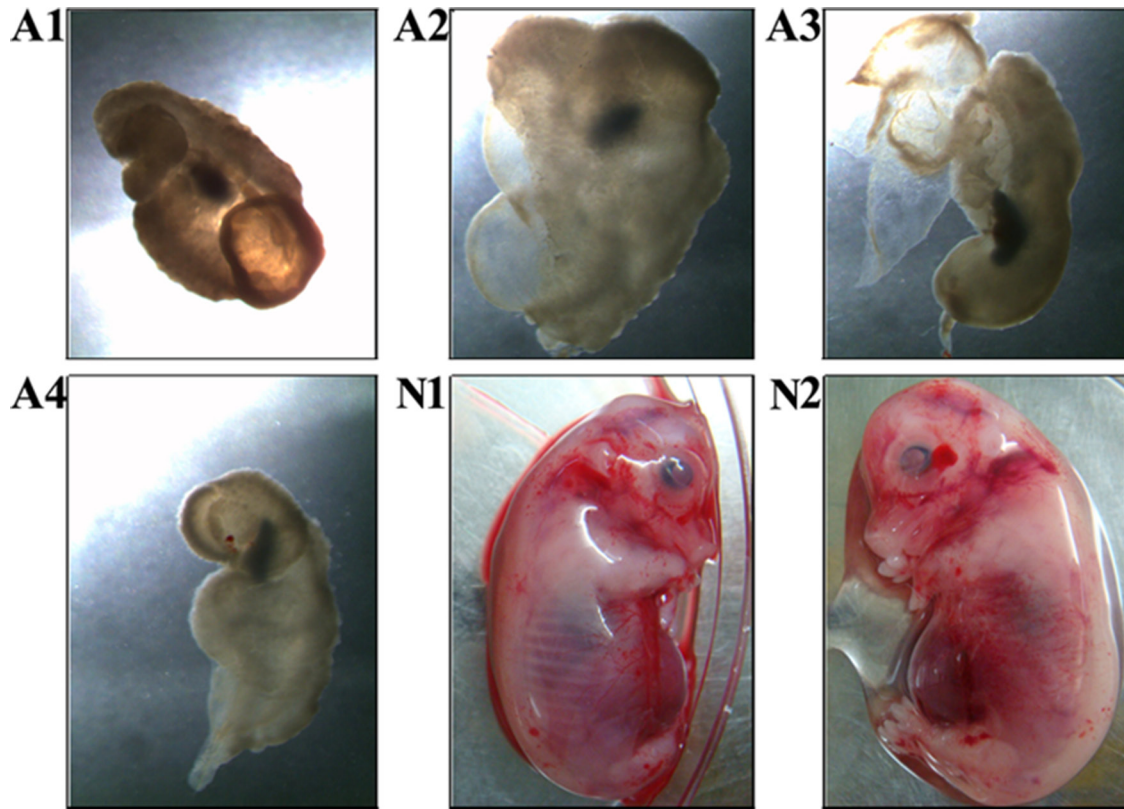

**Supplementary Figure 1: The morphologies of 35-day cloned fetuses.** A1, A2, A3 and A4 represent the morphologically abnormal cloned fetuses, and N1 and N2 represent the morphologically normal cloned fetuses. In comparison with the morphologically normal cloned fetuses, the morphologically abnormal cloned fetuses displayed the obviously smaller sizes.

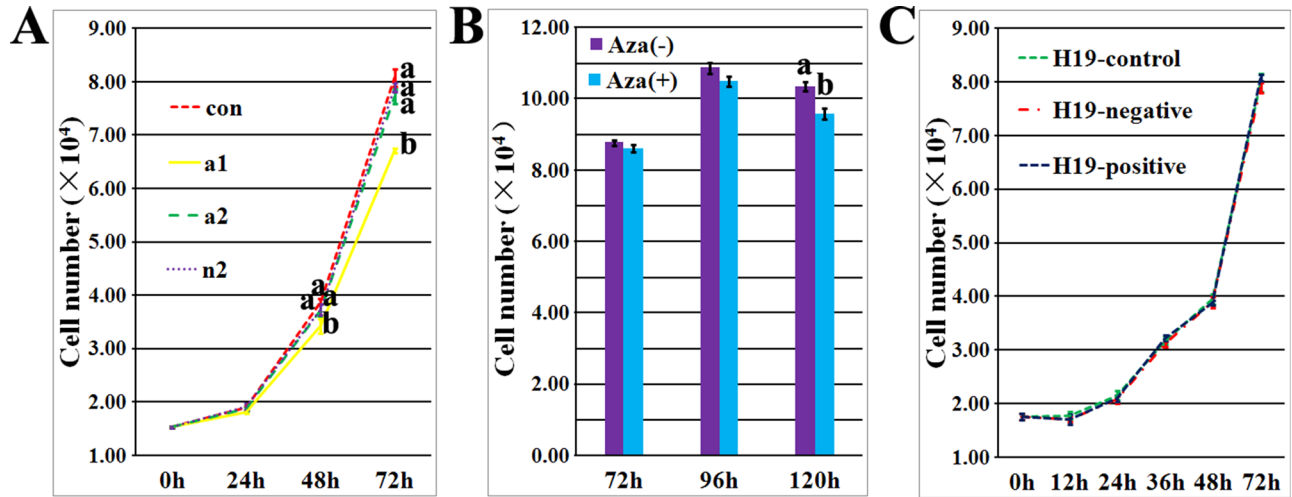

**Supplementary Figure 2: Cell proliferation of PFFs with different treatments.** (A) cell proliferation of PFFs derived from the *in vivo* fertilized, morphologically abnormal cloned and morphologically normal cloned fetuses. (B) cell proliferation of the normal imprinting PFFs treated with 5-aza-dC. (C) cell proliferation of the abnormal imprinting PFFs after H19 knockdown. Only PFFs with no significant change of cell proliferation after different treatments were used for the subsequent somatic cell nuclear transfer. con, a1 (2) and n2 represent PFFs derived from the *in vivo* fertilized, morphologically abnormal cloned and morphologically normal cloned fetuses, respectively. Aza (+) represents PFFs treated with 5-aza-dC. H19-control, H19-negative and H19-positive represent PFFs transfected with none siRNA, negative siRNA and positive siRNA, respectively. The data were expressed as mean  $\pm$  SEM. <sup>a-b</sup>Values at a certain time point with different superscripts differ significantly ( $P < 0.05$ ).

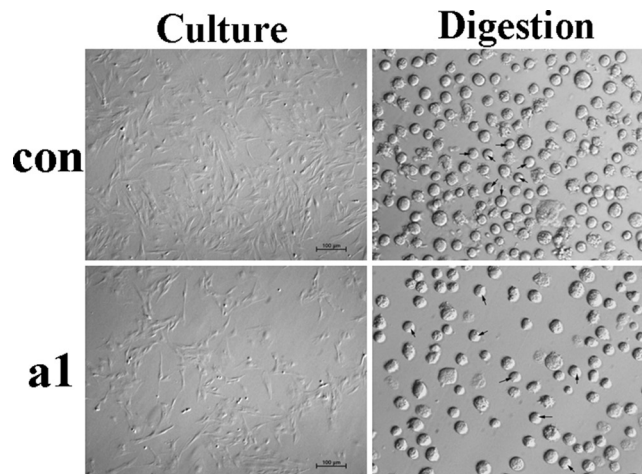

**Supplementary Figure 3: Cell morphologies of PFFs under culture and digestion.** con and a1 represent PFFs derived from the *in vivo* fertilized and morphologically abnormal cloned fetuses. a1 displayed the poor cell proliferation.
